# Supplementary material for: Small upconversion-ruthenium nanohybrids for cancer theranostics
Source: Royal Society of Chemistry journal article supplement (doi:10.1039/d4nr04210g), 2024-12-27
Supplement: d4nr04210g1.pdf [file d4nr04210g1.pdf]

# Supporting Information

## Small Upconversion-Ruthenium Nanohybrids for Cancer Theranostics

Anne Nsubuga,<sup>a\*</sup> Nour Fayad,<sup>a</sup> Federico Pini<sup>a,b</sup>, Marta M. Natile,<sup>b</sup> and Niko Hildebrandt<sup>c\*</sup>

[a] Univ Rouen, CNRS, INSA Rouen, Normandie Université, Laboratoire COBRA, 76000 Rouen, France

[b] Istituto di Chimica della Materia Condensata e Tecnologie per l'Energia (ICMATE), Consiglio Nazionale delle Ricerche (CNR), Dipartimento di Scienze Chimiche, Università di Padova, 35131 Padova, Italy

[c] McMaster University, Department of Engineering Physics, Hamilton, ON M8S 4K1, Canada

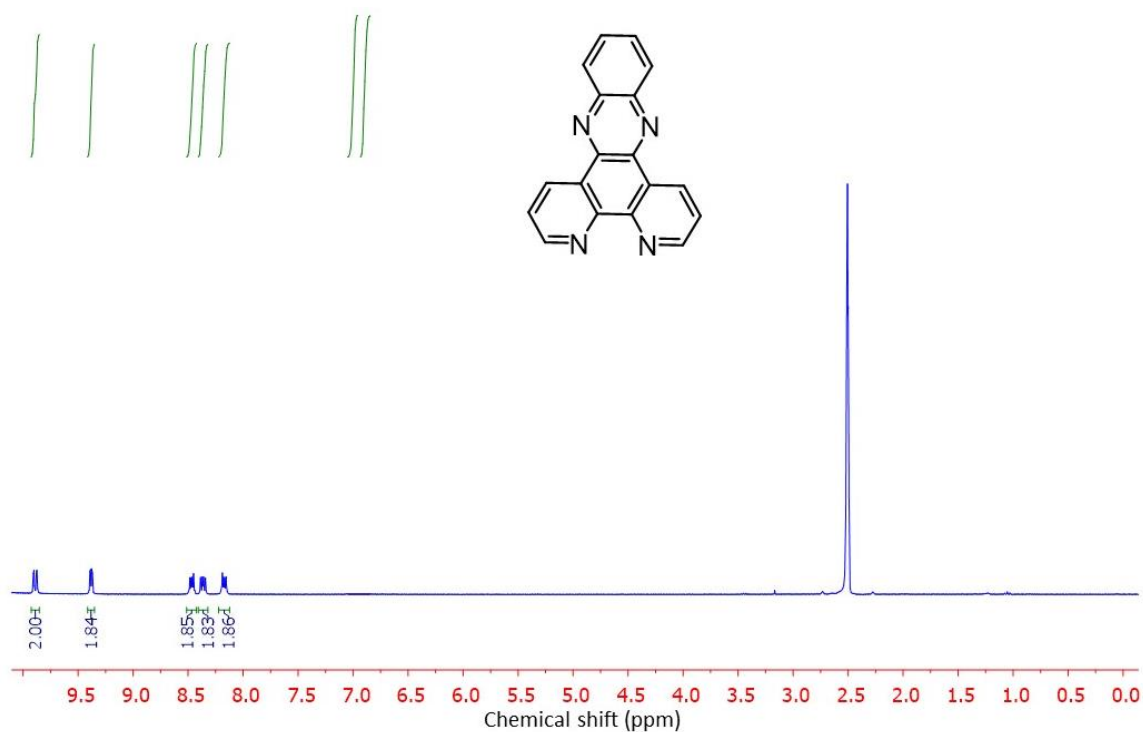

Figure S1: <sup>1</sup>H NMR spectrum (DMSO-d<sub>6</sub>) of DPPZ.

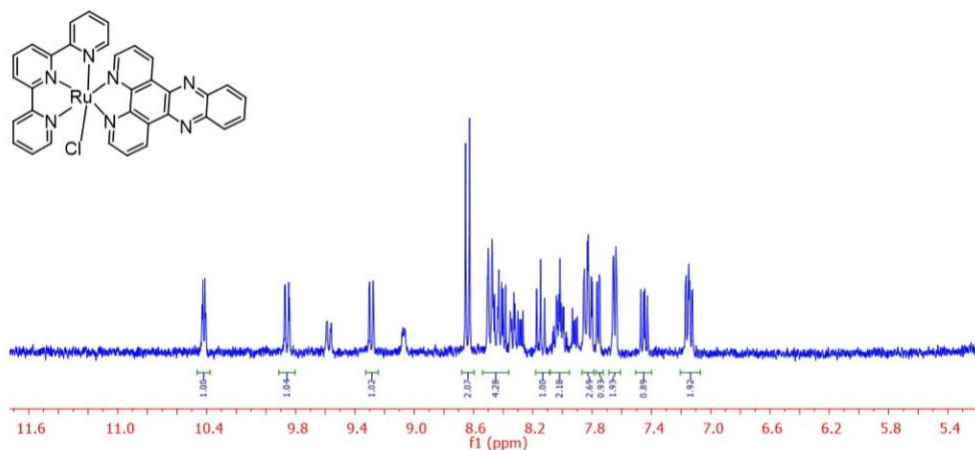

**Figure S2.** <sup>1</sup>H NMR spectrum (MeOD) of [Ru(tpy)DPPZ(Cl)]Cl<sup>-</sup>

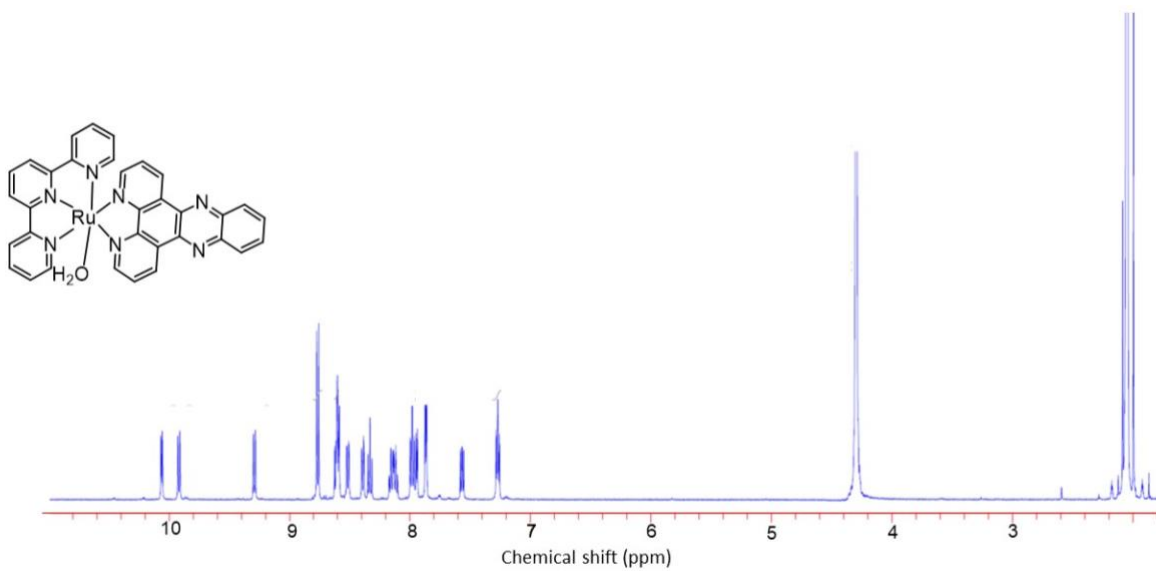

**Figure S3.** <sup>1</sup>H NMR spectrum (MeOD) of [Ru(tpy)DPPZ(H<sub>2</sub>O)](PF<sub>6</sub>)<sub>2</sub>

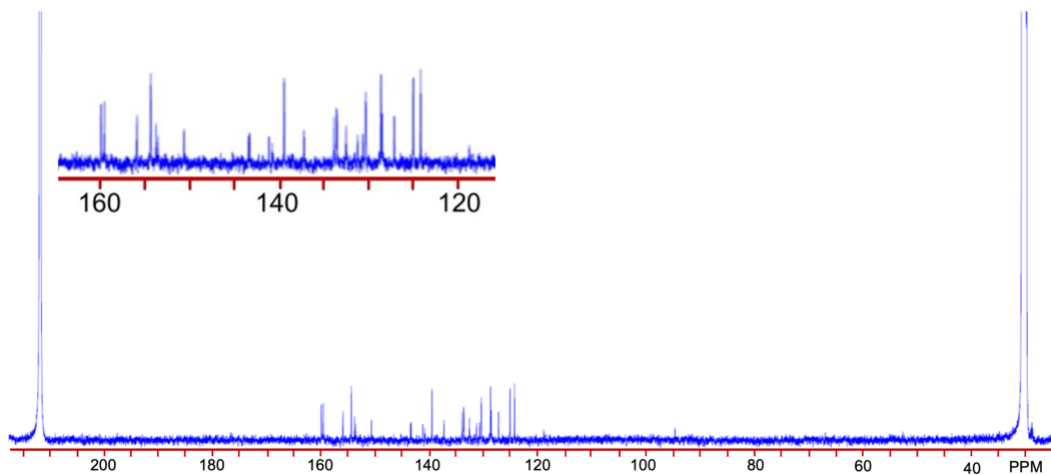

**Figure S4.**  $^{13}\text{C}$  NMR spectrum ( $\text{CD}_3\text{COCD}_3$ , 125 MHz) of  $[\text{Ru}(\text{tpy})\text{DPPZ}(\text{H}_2\text{O})](\text{PF}_6)_2$

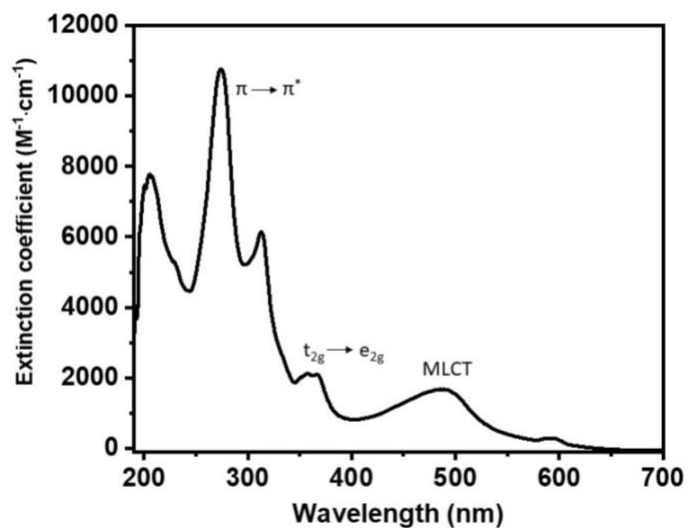

**Figure S5.** Absorption spectrum of  $\text{Ru}(\text{tpy})\text{DPPZ}$  in  $\text{MeOH}$ . The intense UV band at  $\sim 270$  nm comprises the  $\pi \rightarrow \pi^*$  intra ligand transitions, the band at 352 nm corresponds to the  $t_{2g} \rightarrow e_g$  metal centered state, and the band at 487 is indicative of the low-level MLCT of  $\text{Ru}(\text{II})$ .

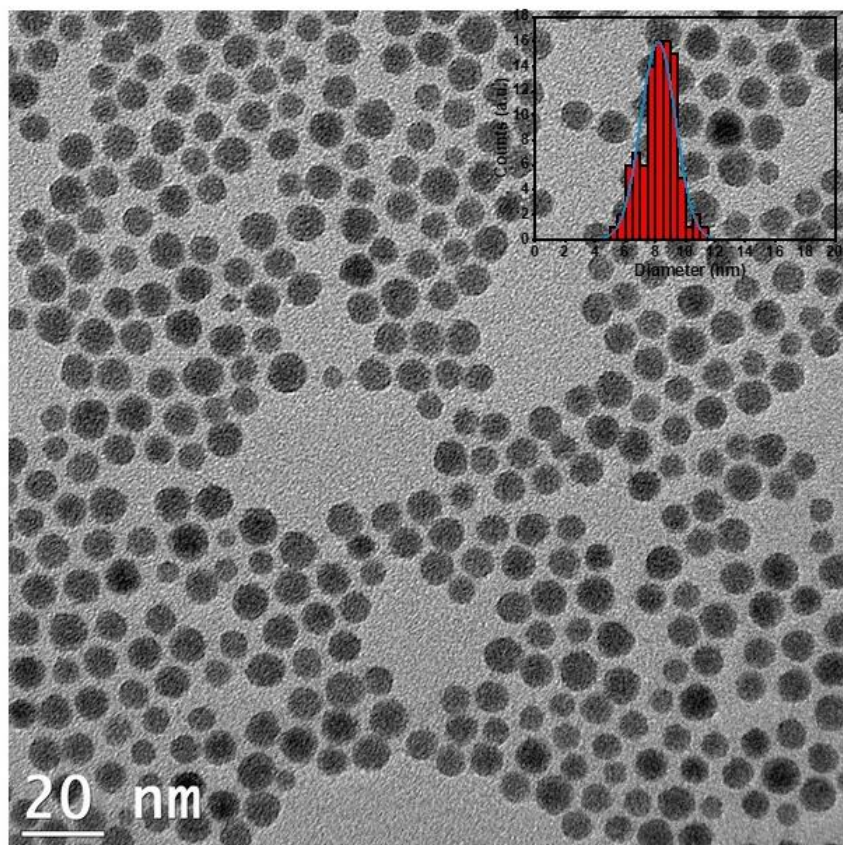

**Figure S6.** TEM micrograph of NaGdF<sub>4</sub>: 25% Yb<sup>3+</sup>, 1% Nd<sup>3+</sup>, 0.5% Tm<sup>3+</sup> UCNPs. The inset displays the size distribution indicating a size of 8.2 ± 1.6 nm.

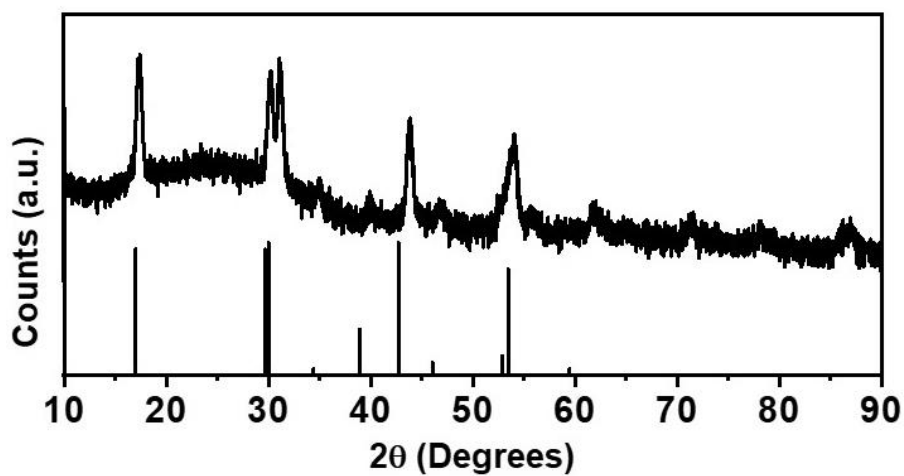

**Figure S7.** XRD diffraction pattern of OA-coated NaGdF<sub>4</sub> UCNPs (top) compared to (β-NaGdF<sub>4</sub>) PDF card 27-0699 (bottom). The diffractions are assigned to the hexagonal β-phase.

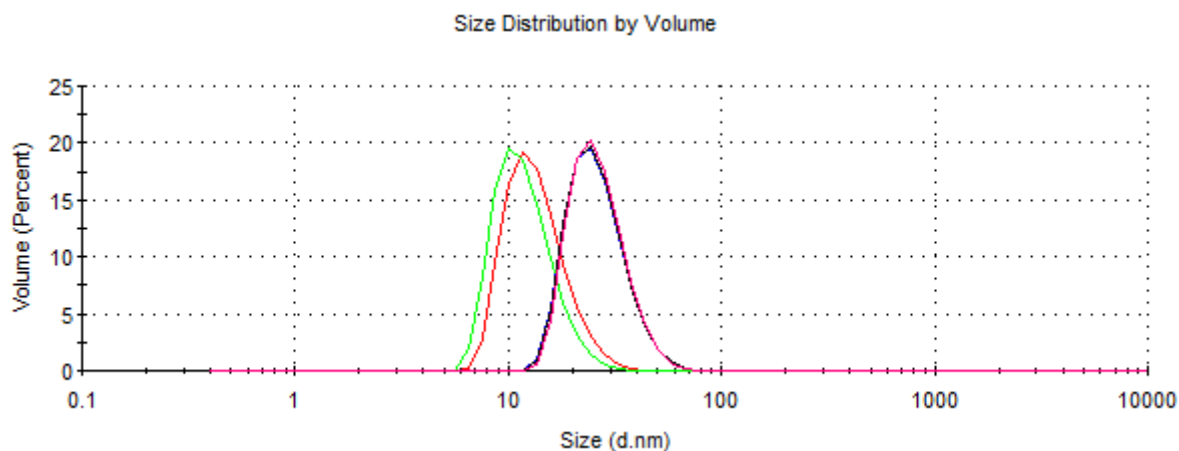

**Figure S8.** DLS spectra showing the hydrodynamic diameter ( $D_h$ ) of OA-coated UCNPs (green), mSiO<sub>2</sub>-UCNPs (red), azo-mSiO<sub>2</sub> UCNPs (purple) and Ru(tpy)DPPZ-loaded azo-mSiO<sub>2</sub>-UCNPs (blue).

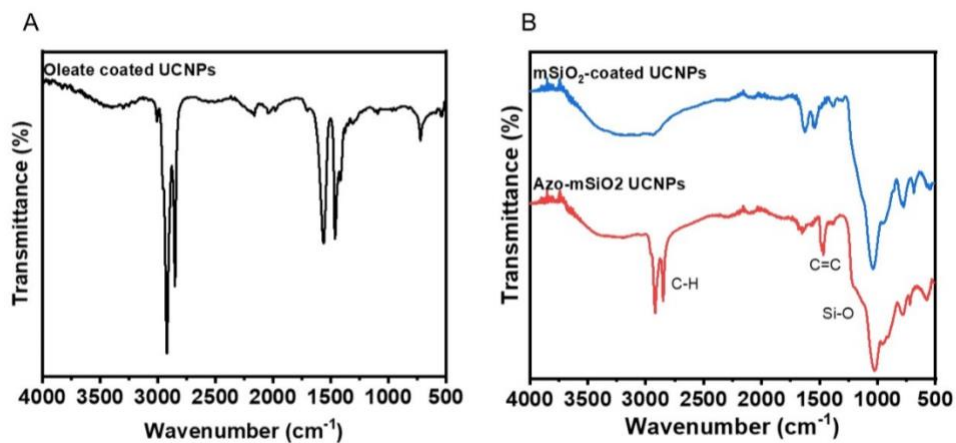

**Figure S9.** FT-IR spectra of **A:** OA-coated UCNPs and **B:** mSiO<sub>2</sub>-UCNPs and azo-mSiO<sub>2</sub>-UCNPs.

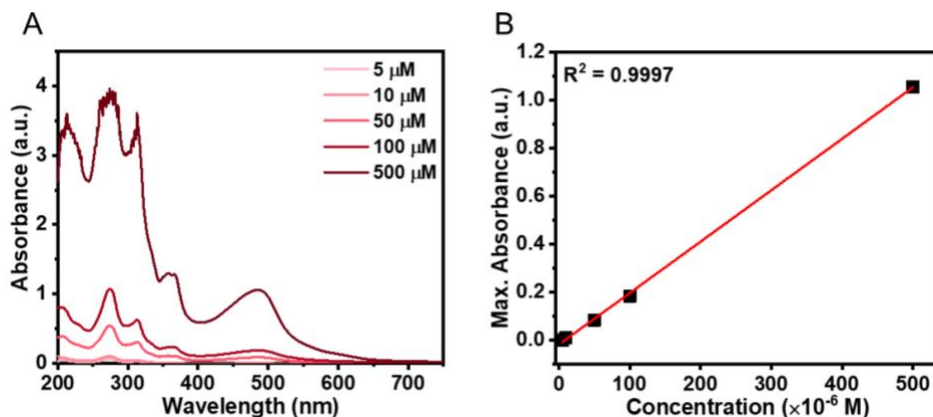

**Figure S10. A:** Absorption spectra for Ru(tpy)DPPZ. **B:** Calibration curve to quantify the concentration of for Ru(tpy)DPPZ embedded in azo-mSiO<sub>2</sub>-UCNPs.

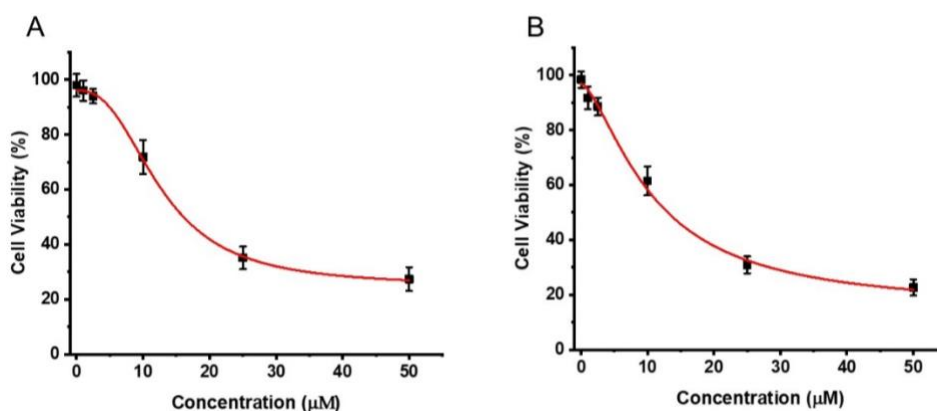

**Figure S11.** Cytotoxicity of Ru(tpy)DPPZ (**A**) and cisplatin (**B**) in MCF-7 cancer cell lines. IC<sub>50</sub> values were calculated using GraphPad software (Prism 7.0). Data are expressed as mean ± SD from a representative of three independent experiments

**Table S1.** Volume-weighted DLS particle size distributions ( $D_h$ ) for azo-mSiO<sub>2</sub>-UCNPs and Ru(tpy)DPPZ loaded azo-mSiO<sub>2</sub>-UCNPs, incubated in DMEM supplemented with 10% fetal bovine serum. All measurements were done in triplicates. Errors present standard deviations.

| UCNP samples                                    | Particle size ( $D_h$ ) in nm (PDI) <sup>[a]</sup> |                                |                                |                                  |                                |
|-------------------------------------------------|----------------------------------------------------|--------------------------------|--------------------------------|----------------------------------|--------------------------------|
|                                                 | as synthesized                                     | +24 h                          | +48 h                          | +72 h                            | +7 days                        |
| azo-mSiO <sub>2</sub> -UCNPs                    | 26.8 ± 2.3 (0.18) <sup>a</sup>                     | 32.4 ± 1.2 (0.19) <sup>a</sup> | 36.4 ± 2.4 (0.21) <sup>a</sup> | 36.4 ± 3.1 (0.20) <sup>a</sup>   | 38.8 ± 3.4 (0.24) <sup>a</sup> |
| Ru(tpy)DPPZ-loaded azo-mSiO <sub>2</sub> -UCNPs | 26.8 ± 2.5 (0.21) <sup>a</sup>                     | 36.1 ± 2.6 (0.24) <sup>a</sup> | 37.8 ± 2.8 (0.22) <sup>a</sup> | 39.1.2 ± 3.6 (0.22) <sup>a</sup> | 44.7 ± 4.2 (0.28) <sup>a</sup> |

[a] PDI = polydispersity index
